# Supplementary material
Source: publisher site journal article supplement (https://www.spandidos-publications.com/1430/downloadSupplementary)

Figure S1. Determination of cell proliferation in WKY VSMCs. VSMCs from WKY were incubated with different concentrations of NPS2143 (0.01, 0.03, 0.1, 0.3 and 1  $\mu$ M) for 12, 24, 48 and 72 h before VSMC proliferation was tested by MTT assay. Data are expressed as the mean  $\pm$  SEM, n=6. VSMC, vascular smooth muscle cell; WKY, Wistar Kyoto rats.

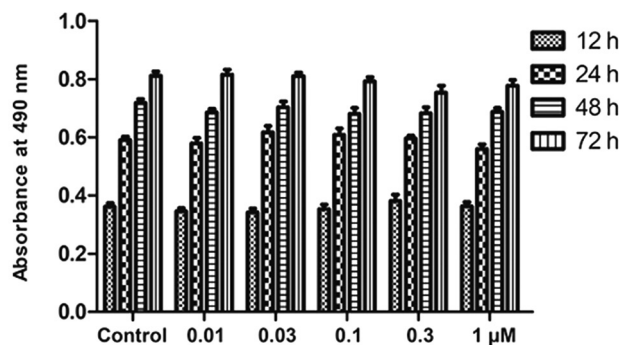

Figure S2. AT1R verification of interference efficiency in SHR VSMCs. (A) Reverse transcription-quantitative PCR analysis of AT1R mRNA expression after transfection. (B) Interference ratio of AT1R mRNA after transfection. (C) Western blot analysis of AT1R protein expression after transfection. (D) Densitometric analysis of AT1R protein after transfection. (E) Interference ratio of AT1R protein after transfection. The data are expressed as the means  $\pm$  SEM, n=6. \*P<0.05 vs. control group; #P<0.05 vs. vehicle group. AT1R, Ang II type 1 receptor. SHR, spontaneously hypertensive rat; VSMC, vascular smooth muscle cell; vehicle, shRNA scrambled transfection; shRNA, short hairpin RNA.

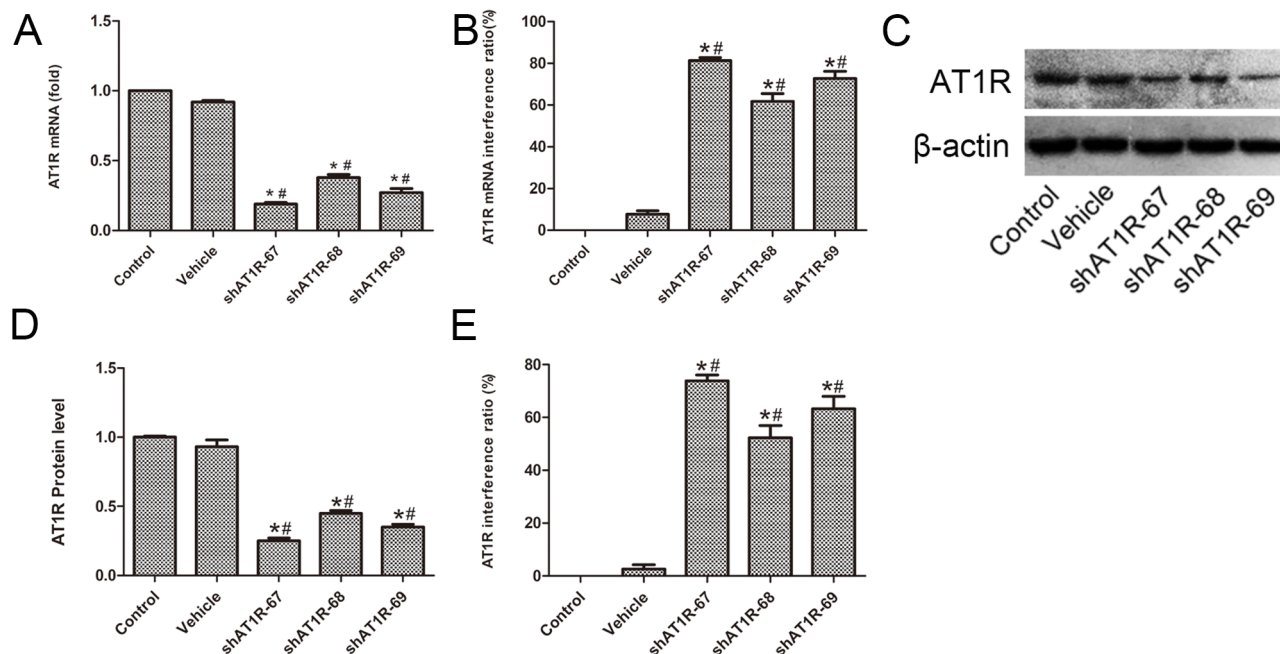

Supplement: Supplementary file 1 [file downloadSupplementary]
